# Supplementary material for: Feeding Practices of Infants and Toddlers by Their Mothers in Selected Northern Emirates of the United Arab Emirates
Source: MDPI journal article supplement (doi:10.3390/nu14183719), 2022-09-09
Supplement: s1 [file s1]

Please select how often your child had each item in the past 28 days. (choose one box) {Food Frequency Questionnaire (FFQ)}

Mark only one oval per row.

|                                                                         | Never                 | 1-3<br>times/month    | 1-3<br>times/week     | >3<br>times/week      | 1-3<br>times/day      | >3<br>times/day       |
|-------------------------------------------------------------------------|-----------------------|-----------------------|-----------------------|-----------------------|-----------------------|-----------------------|
| Breast milk                                                             | <input type="radio"/> |
| Formula/soya milk                                                       | <input type="radio"/> |
| Animal milk<br>(for example:<br>camel's milk,<br>cows, goats,<br>other) | <input type="radio"/> |
| Fruit/vegetable<br>juice,<br>packaged                                   | <input type="radio"/> |
| Fruit/vegetable<br>juice, freshly<br>squeezed                           | <input type="radio"/> |
| Soft drinks                                                             | <input type="radio"/> |
| Water                                                                   | <input type="radio"/> |
| Soup                                                                    | <input type="radio"/> |
| Dairy products<br>(e.g. yogurt,<br>cheese)                              | <input type="radio"/> |
| Cooked<br>cereals (e.g.<br>porridge)                                    | <input type="radio"/> |
| Cold cereals<br>(e.g.<br>cornflakes)                                    | <input type="radio"/> |
| Vitamin A -rich<br>fruit/veg (e.g.                                      | <input type="radio"/> |

carrot,  
spinach)

Other fruits

☐☐☐☐☐☐

Other  
vegetables,  
(does not  
include  
potatoes and  
other tubers)

☐☐☐☐☐☐

Grains (e.g.  
rice)

☐☐☐☐☐☐

Legumes (e.g.  
beans, pulses)

☐☐☐☐☐☐

Pasta/ noodles

☐☐☐☐☐☐

Tubers (e.g.  
potatoes)

☐☐☐☐☐☐

Bread/crackers

☐☐☐☐☐☐

Biscuits/sweet  
snacks

☐☐☐☐☐☐

Chips/savoury  
snacks

☐☐☐☐☐☐

sweet jelly

☐☐☐☐☐☐

Honey

☐☐☐☐☐☐

Egg

☐☐☐☐☐☐

Red/organ  
meats (e.g.  
beef, lamb,  
pork, liver)

☐☐☐☐☐☐

Fish

☐☐☐☐☐☐

Poultry (e.g.  
chicken)

☐☐☐☐☐☐

Take-away

☐☐☐☐☐☐

food (e.g.  
pizza)

---

Spreads (e.g.  
nutella, peanut  
butter)/oils

☐☐☐☐☐☐

Thank for your participation

---

This content is neither created nor endorsed by Google.

Google Forms
