# Supplementary material for: Feeding Practices of Infants and Toddlers by Their Mothers in Selected Northern Emirates of the United Arab Emirates
Source: MDPI journal article supplement (doi:10.3390/nu14183719), 2022-09-09
Supplement: s1 [file s1]

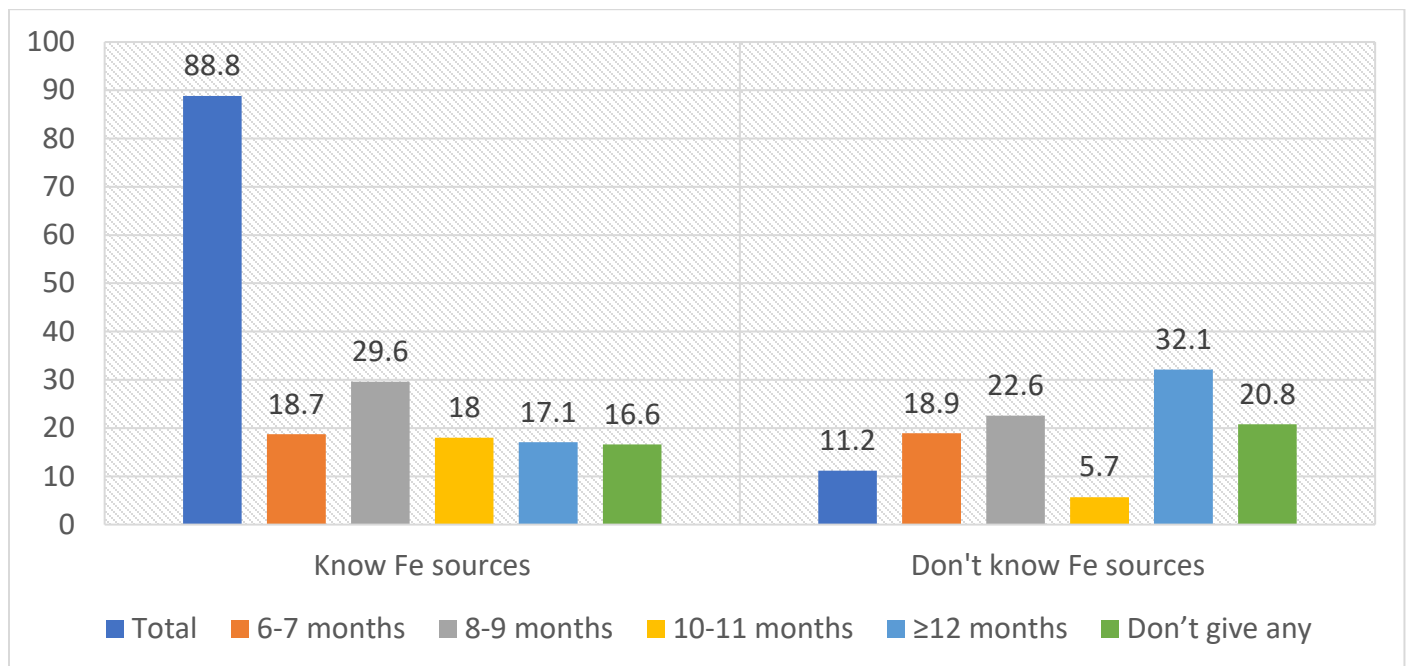

**Figure, S2:** Percentage of mothers that have given animal-based protein to their children and timing by knowledge of food sources of iron.  $p=0.024$ , assessed using chi-square test at  $\alpha=5\%$ ; Fe= Iron
